# Supplementary material for: Axl acts as a tumor suppressor by regulating LIGHT expression in T lymphoma
Source: PubMed Central journal article supplement (PMC5400533; doi:10.18632/oncotarget.15830), 2017-03-02
Supplement: oncotarget-08-20645-s001.pdf [file oncotarget-08-20645-s001.pdf]

## Axl acts as a tumor suppressor by regulating LIGHT expression in T lymphoma

### SUPPLEMENTARY TABLE

Supplementary Table 1: Primers used in RT-PCR, real-time PCR and cloning

| Primers for RT-PCR                                           |                                             |                                                         |
|--------------------------------------------------------------|---------------------------------------------|---------------------------------------------------------|
| Gene                                                         | Sense (5'-3')                               | Antisense (5'-3')                                       |
| mouse Axl                                                    | CCC AGA ACC TGT GGT CAT CT                  | ACC GAG ACA TCA GGG CAT AC                              |
| human Axl                                                    | CCC AGC ACC TGT GGT CAT CT                  | ACC GCG ACA TCA AGG CAT AC                              |
| mouse LIGHT                                                  | GCA TCA ACG TCT TGG AGA CA                  | ATA CGT CAA GCC CCT CAA GA                              |
| human LIGHT                                                  | ACA TCT ACT CCA AGG TGC AGCTGG<br>GCG G     | CCG AAT TCT CAC ACC ATG AAA GCC<br>CCG AAG TA           |
| $\beta$ -actin                                               | GTG GGG CGC CCC AGG CAC CA                  | CTC CTT AAT GTC ACG CAC GAT TTC                         |
| Primers for Real-time PCR                                    |                                             |                                                         |
| Gene                                                         | Sense (5'-3')                               | Antisense (5'-3')                                       |
| LIGHT                                                        | CGT CCG TGT GCT GGA TGA                     | ACC ATG AAA GCC CCG AAG TA                              |
| CCL5                                                         | TCT CTG CAG CTG CCC TCA CC                  | CT TGA ACC CAC TTC TTC TC                               |
| CCR5                                                         | GAC ATC CGT TCC CCC TAC AAG                 | TCA CGC TCT TCA GCT TTT TGC AG                          |
| Primers for cloning of deletion constructs of LIGHT promoter |                                             |                                                         |
| Gene                                                         | Sense (5'-3')                               | Antisense (5'-3')                                       |
| LIGHT(441)-luc                                               | CTA CTC GAG CTT GTC TCT CTGGCT<br>CCA CCA G | CCG AAG CTT GCC CAA GGT GTC<br>TGGAGC AGG GCT GAC ACG C |
| LIGHT(242)-luc                                               | CTA CTC GAG GAA GCC TCT GGAAAG<br>TGT GAG A | CCG AAG CTT GCC CAA GGT GTC<br>TGGAGC AGG GCT GAC ACG C |
| LIGHT(190)-luc                                               | CTA CTC GAG GAC CGG GGGCGG CGG<br>GTA CCG G | CCG AAG CTT GCC CAA GGT GTC<br>TGGAGC AGG GCT GAC ACG C |
| LIGHT(124)-luc                                               | CTA CTC GAG CTC TAA AGG CGGCC<br>ACG GGT G  | CCG AAG CTT GCC CAA GGT GTC<br>TGGAGC AGG GCT GAC ACG C |
| Primers for cloning of site directed mutagenesis of Sp1      |                                             |                                                         |
| Mutant Sp1 (-193/-168)                                       | GCC AAG ACC GTT GCG GCG GGT ACC             | GGT ACC CGC CGC AAC GGT CTT GGC                         |
